# Supplementary material for: IRF2 Destabilizes Oncogenic KPNA2 to Modulate the Development of Osteosarcoma
Source: Hindawi journal article supplement (doi:10.1155/2022/9973519), 2022-09-26

**A**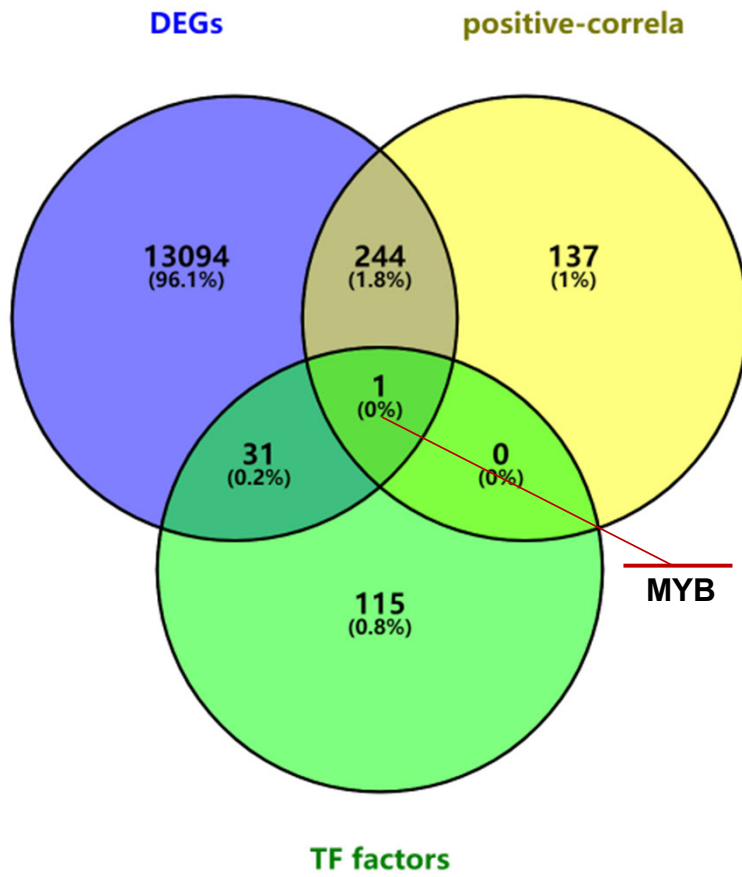**B**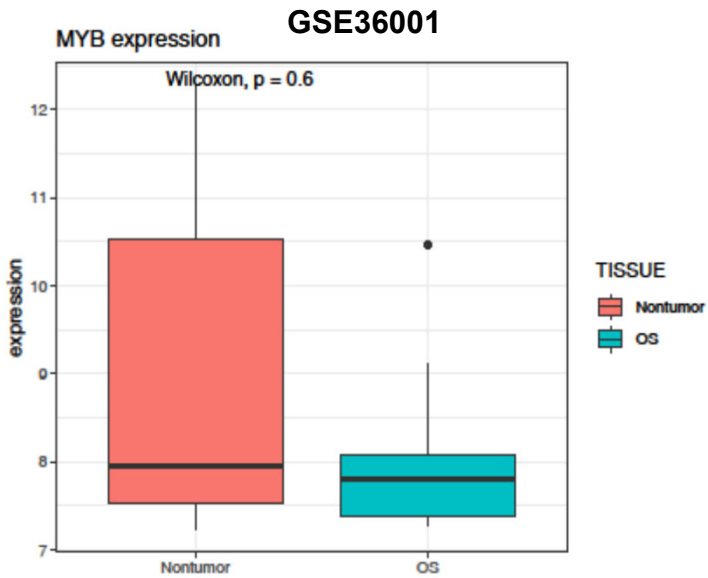**C**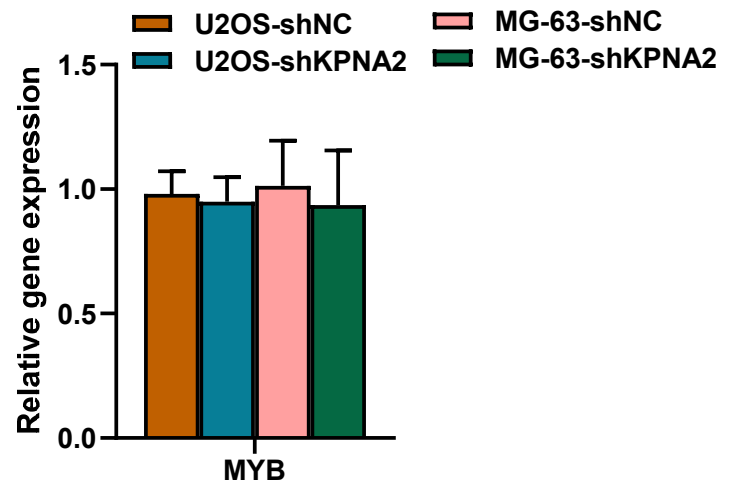

Supplement: f1 [file 9973519.f1.pdf]
